# Supplementary material for: d-Serine enzymatic metabolism induced formation of a powder-remoldable PAAM–CS hydrogel
Source: Royal Society of Chemistry journal article supplement (doi:10.1039/c7cc06733j), 2017-01-01
Supplement: c7cc06733j1.pdf [file c7cc06733j1.pdf]

# Electronic Supplementary Information for

## **D-Serine enzymatic metabolism induced formation of powder-remoldable PAAM-CS hydrogel †**

Shuang Zhang,<sup>a</sup> Qingcong Wei,<sup>b</sup> Yinghui Shang,<sup>a</sup> Qi Zhang,<sup>a</sup> and Qigang Wang<sup>\*,a</sup>

<sup>a</sup> School of Chemical Science and Engineering, Tongji University, Shanghai 200092, China.

<sup>b</sup> School of Chemistry and Chemical Engineering, Henan Normal University, Xinxiang 453007, China.

### **Contents**

| <b>Index</b>                                                     | <b>Page</b> |
|------------------------------------------------------------------|-------------|
| <b>1.Experimental section</b> .....                              | <b>S2</b>   |
| <b>Materials</b> .....                                           | <b>S2</b>   |
| <b>Synthesis of methacrylated chondroitin sulfate (CS)</b> ..... | <b>S2</b>   |
| <b>Preparation of gel</b> .....                                  | <b>S2</b>   |
| <b>Visualized gelation</b> .....                                 | <b>S2</b>   |
| <b>Self-healing ability</b> .....                                | <b>S3</b>   |
| <b>Reprinting of lypholized gel powder</b> .....                 | <b>S3</b>   |
| <b>Cytotoxicity assay</b> .....                                  | <b>S3</b>   |
| <b>Rapid hemostatic and wound healing</b> .....                  | <b>S4</b>   |
| <b>2.Characterization</b> .....                                  | <b>S4</b>   |
| <b>Rheological analysis</b> .....                                | <b>S4</b>   |
| <b>Mechanical analysis</b> .....                                 | <b>S5</b>   |
| <b>Scanning electron microscopy (SEM) measurement</b> .....      | <b>S5</b>   |

|   |                                                               |            |
|---|---------------------------------------------------------------|------------|
| 1 | <b>Electron Paramagnetic Resonance (EPR) measurement.....</b> | <b>S5</b>  |
| 2 | <b>Gel Permeation Chromatography (GPC) measurement .....</b>  | <b>S5</b>  |
| 3 | <b><sup>1</sup>H NMR measurement .....</b>                    | <b>S6</b>  |
| 4 | <b>UV - Vis spectroscopy.....</b>                             | <b>S6</b>  |
| 5 | <b>3.Figures and table .....</b>                              | <b>S6</b>  |
| 6 | <b>4.References.....</b>                                      | <b>S12</b> |

## 1 **1. Experimental section**

2 **Materials:** Horseradish peroxidase (HRP, EC 1.11.1.7, MW = 40 Kda, 300 U/mg), Chondroitin  
3 sulfate sodium salt (CS, MW =  $5 \times 10^4$  Kda), and D-Serine were purchased from Shanghai  
4 Baoman Biotechnology Co., Ltd. D-Amino acid oxidase from porcine kidney (DAAO, 5.4U/mg)  
5 and Catalase from bovine liver (2000U/mg) were purchased from Sigma-Aldrich. Tris-HCl (pH 9,  
6 1M) was purchased from Beijing Solarbio Science & Technology Co., Ltd. Acrylamide was  
7 purchased from Aladdin Industrial Inc. (Shanghai, China). Concentrated hydrochloric acid (HCl,  
8 37.5 wt%), Ethanol and Rhodamine B were purchased from Sinopharm Chemical Reagent Co.,  
9 Ltd. (Shanghai, China). Glycidyl methacrylate was purchased from Energy Chemical (Shanghai,  
10 China). O-phenylenediamine was purchased from Qiangshun Chemical Reagent Co., Ltd  
11 (Shanghai, China). All materials were used as received without further purification.

12 **Synthesis of methacrylated chondroitin sulfate (CS):** The modification of chondroitin sulfate  
13 was adapted from the literature.<sup>1</sup> Briefly, chondroitin sulfate (2.08 g) was dissolved in 50 mL of  
14 water for 2 h at room temperature to form a homogeneous solution. Subsequently, the pH of the  
15 solution was adjusted to 3.5 by adding 0.1 M HCl. Then, glycidyl methacrylate (675  $\mu$ L, 5.10  
16 mmol) was added to the solution, and the mixture was stirred at 50 °C for 24 h. After that, 100  
17 mL of ethanol was added and white precipitation was produced, followed by filtering three times  
18 with ethanol to gain the white product. The product was subsequently dissolved in water,  
19 followed by dialysis (MWCO 10000) against deionized H<sub>2</sub>O for 5 days. The dialysate was finally  
20 lyophilized to give a white powder product and was stored at room temperature prior to use. The  
21 <sup>1</sup>H NMR spectra (Bruker, 400 MHz, D<sub>2</sub>O) of the product verified the success of methacrylated  
22 chondroitin sulfate.

23 **Preparation of gel:** The gel was prepared in the following procedure. 200  $\mu$ L of D-Ser (1 M),  
24 100  $\mu$ L of modified chondroitin sulfate (10 wt%), and 250  $\mu$ L of AAM (40 wt%) were added to  
25 370  $\mu$ L Tris-HCl (pH 9.0) solution respectively, and were mixed thoroughly on vortex to gain a  
26 transparent solution, After the addition of 80  $\mu$ L of a D-AAO solution (2.5 mg/mL), the vial was  
27 placed in water bath at 37 °C for several minutes to give a yellow transparent and self-standing  
28 hydrogel. The addition of catalase was the same as above procedure except the addition of  
29 catalase solution (20  $\mu$ L, 5 mg/mL) after adding D-AAO solution.

30 **Visualized gelation:** The visualized printing was carried out by using a 3D printer (Nano-Plotter  
31 NP 2.1, GeSiM, Grosserkmannsdorf, Germany) of Shanghai Institute of Ceramics (Chinese

1 Academy of Sciences). The procedure was as follows. Typically, 1000  $\mu\text{L}$  of D-Ser (1 M), 500  
2  $\mu\text{L}$  of modified chondroitin sulfate (10 wt%), and 1250  $\mu\text{L}$  of AAM (40 wt%) were added to  
3 1800  $\mu\text{L}$  OPD (pH 9.0, 100 mM) solution respectively, and were mixed thoroughly on vortex,  
4 after adding of 400  $\mu\text{L}$  of D-AAO solution (2.5 mg/mL) and 50  $\mu\text{L}$  of HRP solution (0.05  
5 mg/mL), the vial was placed in water bath at 37 °C for several minutes (10-15 minutes), and the  
6 color gradually turned into yellow-green. Transferring the mixture into the printing syringe, and  
7 fixed the printing syringe to the printer to start printing. The as-obtained pattern was still placed  
8 in water bath at 37 °C for further color change.

9 **Self-healing ability:** The two colors hydrogels were cut in half respectively and simply putted  
10 two pieces of cracked hydrogel plates which were yellow and red (addition of rhodamine  
11 B)together and kept contacting for 24 h at 37 °C.

12 **Reprinting of lyophilized gel powder:** The hydrogels were firstly lyophilized and the soybean  
13 milk machine was used to smash them into powder. Then, a certain proportion of water and  
14 powder (Since 1 g of the hydrogel obtained 0.13 g of the powder, so the proportion was 870  $\mu\text{L}$   
15 of water per 0.13 g of powder) were directly putted into a printing syringe in succession and  
16 mixed thoroughly, the powder could absorb water immediately and supported itself in a few  
17 seconds. The printing syringe was loaded into the printer and the pre-designed patterns were  
18 printed. The recoverable property was showed by the tensile length before and after the repair  
19 with a ruler.

20 **Cytotoxicity assay:** NIH-3T3 cell (obtained from Wuhan Biofavor Biothch Service Co., Ltd)  
21 was chosen as model cell to evaluate the cytotoxicity of samples by using CCK-8 assay. The  
22 powder was sterilized under UV irradiation for 120 mins before the assay. NIH-3T3 cells were  
23 cultured in DMEM. The culture media were supplemented with 10% fetal bovine serum and 1 %  
24 penicillin/streptomycin. The NIH-3T3 cells were seeded into 96-well culture plates (Corning,  
25 USA) with a density of  $5.0 \times 10^3$  cells/well and cultured overnight at 37 °C before test. Then the  
26 culture medium was removed and fresh medium without antibiotics was added into the plates,  
27 after that the samples with various final concentration of 1  $\mu\text{g/mL}$ , 5  $\mu\text{g/mL}$ , 10  $\mu\text{g/mL}$  and 20  
28  $\mu\text{g/mL}$  were put into culture plates and co-cultured for 24 h and 48 h at 37 °C in 5 %  $\text{CO}_2$ ,  
29 respectively. A blank control (no sample) was also conducted for each time point. At each time  
30 point, the samples and culture mediums were removed and fresh medium with 10  $\mu\text{L}$  CCK-8  
31 solution was added into plates, then incubated for 4 h at 37 °C. The absorbance values of

1 resulting solutions were recorded at 450 nm with a microplate reader (MULTISKAN MK3,  
2 Thermo). The results were indicated as percentage of cell viability relative to the blank control at  
3 each time point. The experiment was repeated twice, and each concentration of the sample was  
4 performed in three and six times, respectively.

5 **Rapid hemostatic and wound healing:** All experiments involving animals were ethically and  
6 scientifically approved by the University and complied with Practice for Laboratory Animals in  
7 China. The adult Sprague-Dawley (SD) rats (180–200 g, 8 weeks old) were supplied by  
8 Experimental Animal Research Center of Hubei. Adult SD rats were randomly divided into three  
9 groups to assess the rapid hemostatic and wound healing behavior of powder and regenerated  
10 hydrogels. All rats were anesthetized by intraperitoneal injection of 10 % chloral hydrate at a  
11 dose of 0.33 mL/100 g body weight before experiment. The hair on the light leg of each rat was  
12 shaved and the skin was sterilized with medical alcohol. A full-thickness skin wound of 0.7 cm ×  
13 0.7 cm area was created on the light leg of each rat. Then, the artery exposed at each skin wound  
14 was poked a little hole by using a syringe needle to make a hemostatic model. The bleeding  
15 wounds were scattered and covered by the powder and regenerated hydrogels respectively, the  
16 hemostatic time was recorded. The wounds were further covered by surgical tape and fixed with  
17 sterile gauze. The control group was just covered by surgical tape and fixed with sterile gauze  
18 without adding powder or regenerated hydrogel. The rats were kept in separate cages with free  
19 access to food and water in a temperature controlled room at 25 °C. The surgical tape and sterile  
20 gauze were replaced every second day and the wound area was measured by a ruler along its side  
21 and photographed to record its healing condition. In order to further investigate the degree of  
22 wound healing, all the SD rats were sacrificed after 10 days of surgery by excess chloral hydrate.  
23 The wound regions were quickly removed, and they were fixed in buffered 10% formalin  
24 solution for 24 h, washed and dehydrated by serial dilutions of alcohol, the tissue samples were  
25 cleared in xylene and embedded in paraffin, then sectioned in 4 μm (Leica RM 2016, Germany).  
26 Sections were stained by Hematoxylin (Sigma, America) & Eosin (H & E) (Solarbio, Beijing,  
27 China). The bright-field optical microscope (Olympus BX 53, Tokyo, Japan) was used to  
28 measured the stained sections for histological examination. Three separate sections from each  
29 wound were examined by light microscopy.

## 30 **2. Characterization**

1 **Rheological analysis:** The rheological properties of hydrogels were measured using a Thermo  
2 Haake RS6000 rheometer (Thermo Scientific) with parallel plate geometry (diameter: 20 mm, 0.5  
3 mm gap) at 37 °C. The storage modulus ( $G'$ ) and loss modulus ( $G''$ ) were measured as a function  
4 of time to accomplish dynamic time sweep measurements at a fixed frequency of 1.00 Hz and a  
5 fixed stress of 1.00 Pa, the change of system viscosity over time can be tested simultaneously.  
6 The rheology of the visualized injecting process was also measured as above. All the tests were  
7 repeated at least three times.

8 **Mechanical analysis:** The mechanical analysis of the hydrogels was carried out on a FR-108B  
9 (Farui Co., China) testing machine. The compressive tests were measured at a speed of 1 mm/min  
10 and compressed to 90 %. The diameter of the samples was 14 mm and the thickness was 6-8 mm.  
11 The stress and strain at strain between 0 to 10 % were adopted to calculate the modulus of the  
12 hydrogels. The tensile tests of hydrogels were taken at an extension speed of 10 mm/min, the  
13 tests were performed at room temperature with the shape of rectangle. All the tests were repeated  
14 at least three times.

15 **Scanning electron microscopy (SEM) measurement:** The hydrogel samples were soaked in  
16 water for 4 h to gain the swelled hydrogel samples before freezing in -20 °C refrigerator for  
17 several hours. The freezed samples were further dried in vacuum for ca. 3 days. The freeze-dried  
18 samples were sputtered with a layer of gold before the test with a field emission scanning electron  
19 microscopy (Hitachi S-4800) at a voltage of 3 KV.

20 **Electron Paramagnetic Resonance (EPR) measurement:** The EPR results were performed on  
21 an EPR Spectrometer (A300, Bruker) at 9.873 GHz. To ascertain the initiating carbon radicals in  
22 this system, the mixture of D-AAO, D-Ser and modified chondroitin sulfate which were at the  
23 same proportion of hydrogel was rapidly transferred to a standard capillary and placed into the  
24 EPR spectrometer with DMPO (dimethyl pyridine N-oxide, Electron capture agent) as the spin  
25 trap. The spectrum was recorded after 1, 5, 9 and 30 min reaction. To determine the propagating  
26 radical, 10 wt% of the AAM was added to the above initiation system in the absence of DMPO.  
27 The spectrum was recorded after 1, 5, 9 and 30 min reaction.

28 **Gel Permeation Chromatography (GPC) measurement:** The molecular weight of PAAM  
29 formed in the presence of D-AAO and D-Ser was got by Gel Permeation Chromatography (GPC,  
30 Waters 1525) measurement equipped with 2410 refractive index detector and Empower  
31 workstation. Typically, AAM (10 %), D-AAO (0.02 %), D-Ser (2 %) and H<sub>2</sub>O (88 %) were

1 mixed thoroughly and the mixture was placed at room temperature for 24 h to complete the  
2 polymerization. The obtained liquid was tested by the GPC measurement. The mixture of D-  
3 AAO, D-Ser and H<sub>2</sub>O which was the same ratio with the above solution was also tested by GPC  
4 in order to deduct the interference of D-AAO.

5 **<sup>1</sup>H NMR measurement:** The gelation process was monitored by using a Bruker 400 MHz NMR  
6 spectrometer at 37 °C. In our conversion calculation experiments, dimethyl sulfoxide (DMSO)  
7 was selected as an internal standard to calculate the conversion of vinyl double bonds (AAM) in  
8 the D<sub>2</sub>O-substituted precursor. Briefly, 21.08 mg of D-Ser, 100 mg of AAM, and 10 mg of  
9 modified chondroitin sulfate were added to 983.35 μL of D<sub>2</sub>O (pH 9.0, adjusted by adding NaOH )  
10 and shocked vigorously to form a homogeneous solution. Then, 16.65 μL of DMSO and 0.2 mg  
11 of D-AAO were added to the above solution in sequence to gain the final detection solution. The  
12 detection solution was transferred to a NMR tube and placed into the probe of the spectrometer as  
13 quickly as possible and started the timer simultaneously. The gelation process was recorded at  
14 different time.

15 **UV - Vis spectroscopy:** The UV-Vis spectroscopy was tested by using a UV-Vis spectrometer  
16 (UV-2700, Shimadzu) with interval of 0.1 minute. Firstly, 160 μL of D-AAO solution (2.5  
17 mg/mL) and 3840 μL of Tris-HCl (pH 9.0) solution were added to cuvettes as blank sample to  
18 determine the baseline at 450 nm. Then, 500 μL of AAM (40 wt%) solution, 400 μL of D-Ser  
19 (1M), 2000 μL of Tris-HCl (pH 9.0) solution and 200 μL of modified chondroitin sulfate (10  
20 wt%) were added to cuvette and mixed evenly, subsequently, 160 μL of a D-AAO solution (2.5  
21 mg mL<sup>-1</sup>), 20 μL of a HRP solution (0.05 mg/mL), and 720 μL of a OPD solution (pH 9.0, 100  
22 mM) were also added to the cuvette to start the color reaction. The increase in absorbance at 450  
23 nm could be measured with an interval of 0.1 min.

### 1 3. Figures and table

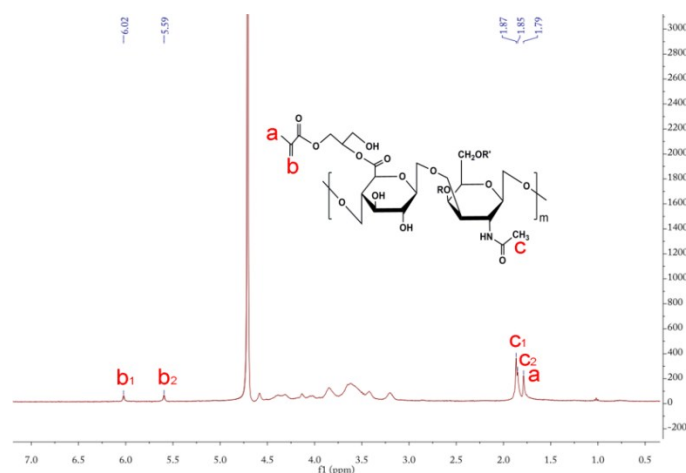

2  
3 **Figure S1.** The  $^1\text{H}$  NMR (400 MHz,  $\text{D}_2\text{O}$ , 20  $^\circ\text{C}$ ) spectra of methacrylated chondroitin sulfate.  
4 The degree of substitution was ca. 0.35. The chemical shifts at 6.02( $b_1$ ) and 5.59 ( $b_2$ ) belong to  
5 the hydrogens on the double bond(b), the chemical shift at 1.87( $c_1$ ) belongs to the methylic  
6 hydrogens in the unmodified CS(c), the chemical shift at 1.85( $c_2$ ) belongs to the methylic  
7 hydrogens in the modified CS(c), the chemical shift at 1.79(a) belongs to the methylic hydrogens  
8 on the methyl(a).

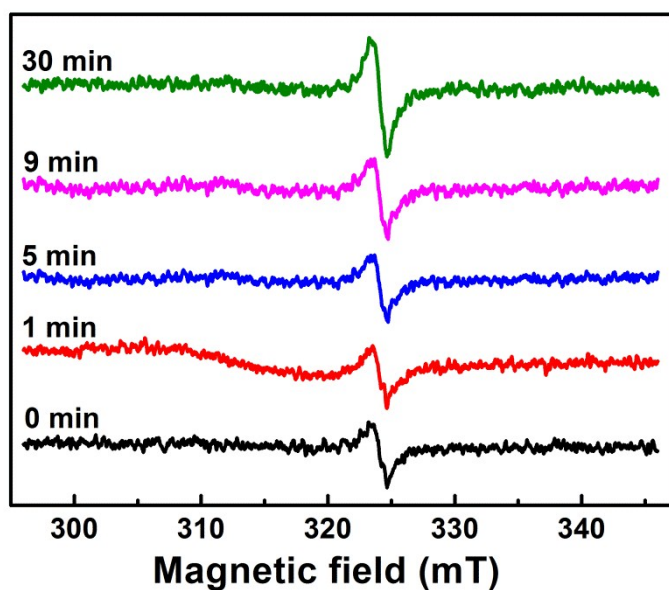

9  
10 **Figure S2.** The EPR spectrum of the D-AAO-mediated redox initiation system with the addition  
11 of AAM, but without the addition of radical adduct (The signals of the propagating carbon  
12 radical).

1

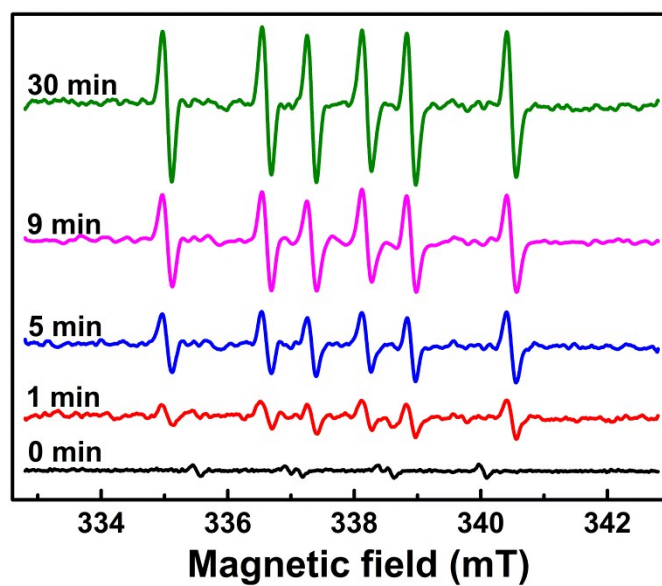

2

3 **Figure S3.** EPR spectrum of the DMPO radical adduct formed in the  $\text{H}_2\text{O}_2$  and pyruvic acid  
4 system without the addition of AAM.

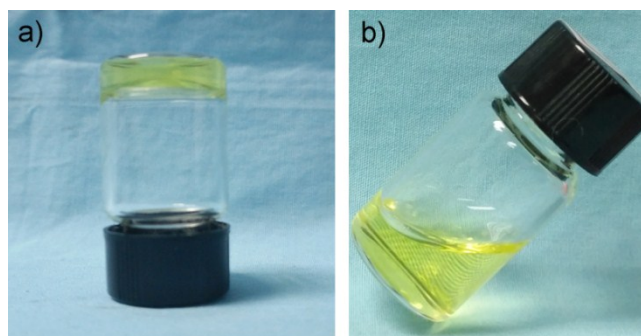

5

6 **Figure S4.** (a) Hydrogel system without catalase. (b) Hydrogel system with catalase.

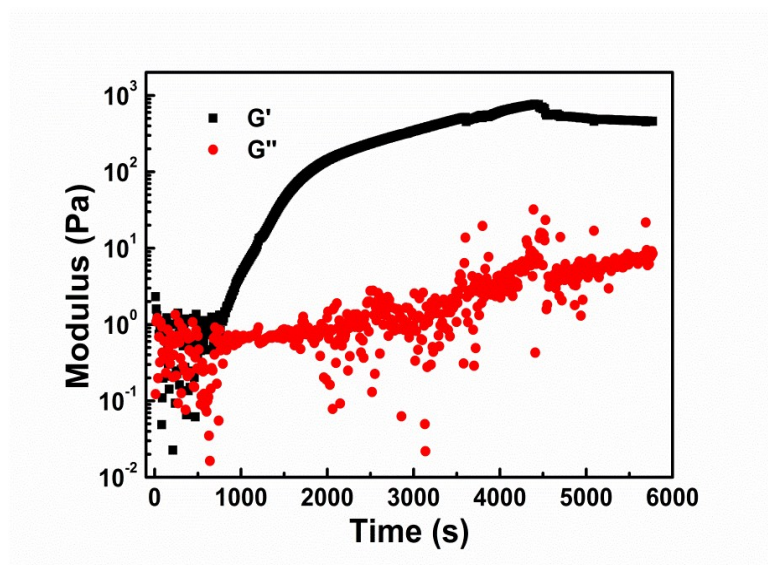

**Figure S5.** Dynamic time sweep test of the visualized gelation system.

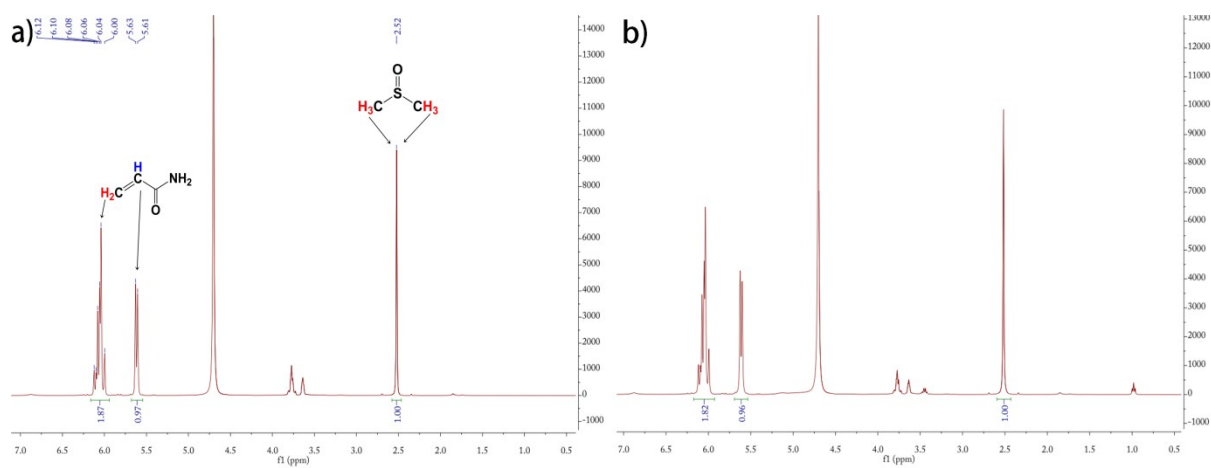

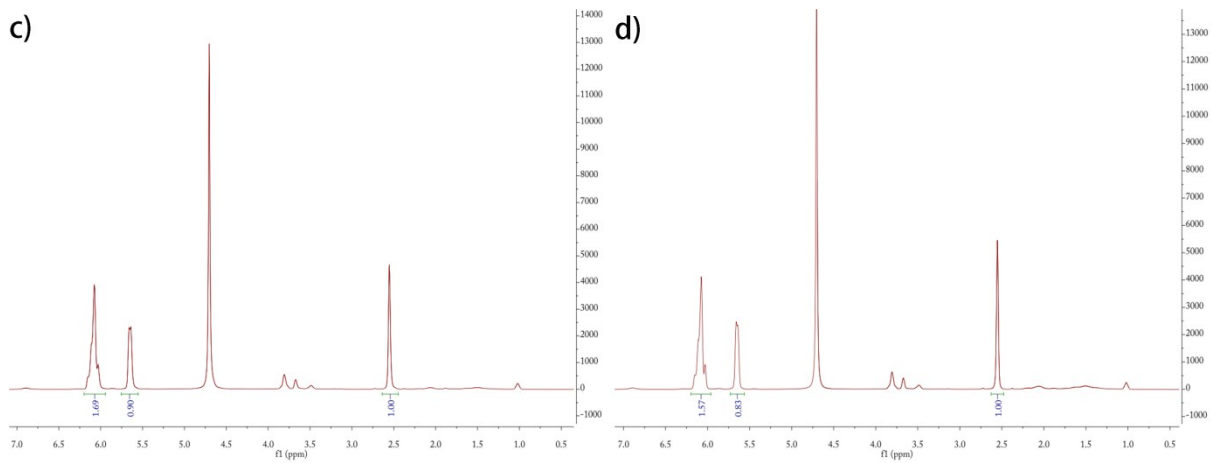

1

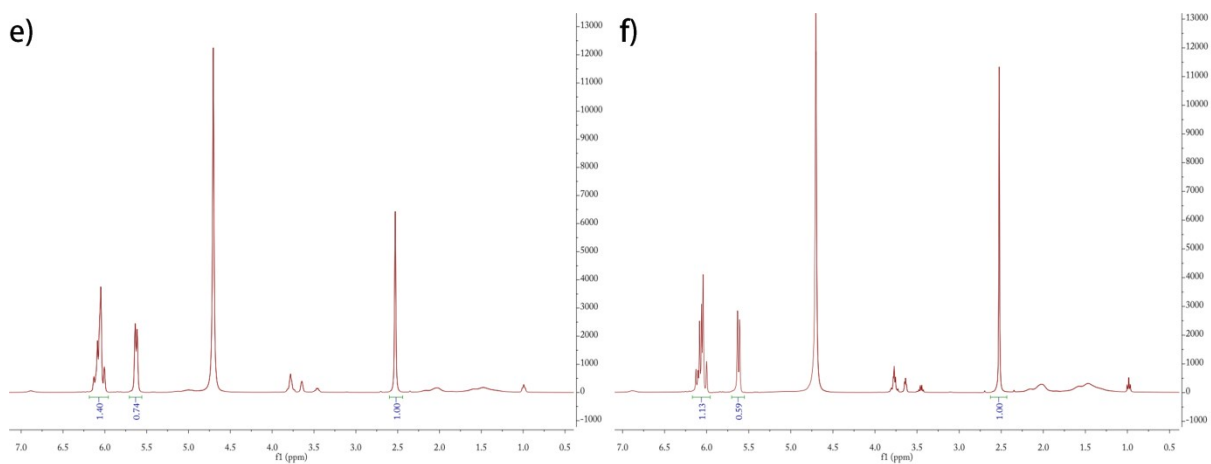

2

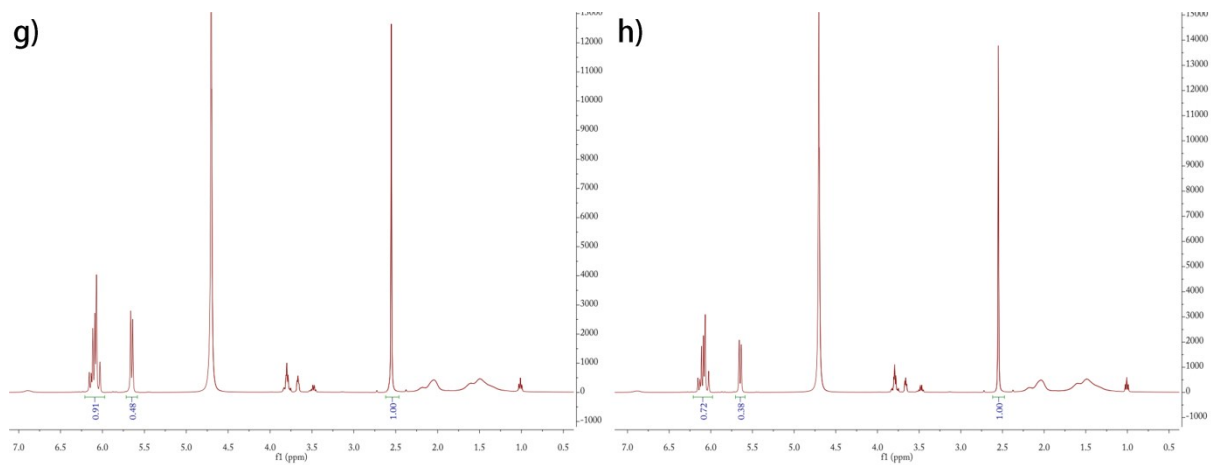

3

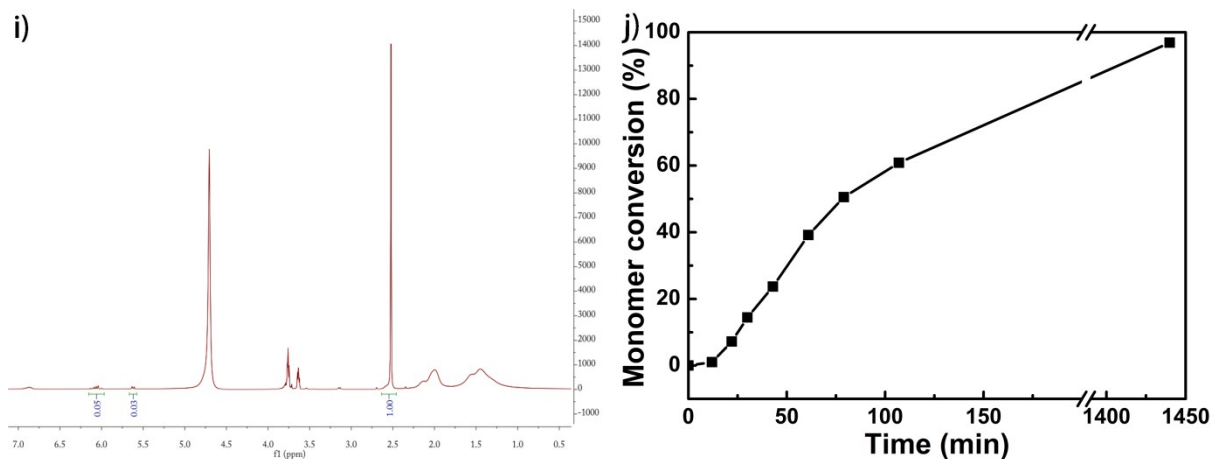

**Figure S6.** The  $^1\text{H}$  NMR spectra of a  $\text{D}_2\text{O}$ -substituted precursor at different reaction times: 0 min (a); 12 min (b); 22 min (c); 30 min (d); 43 min (e); 61 min (f); 79 min (g); 107 min (h); 24 h (i). The conversion of vinyl double bonds (AAM) in the hydrogel is calculated using dimethyl sulfoxide as an internal standard (j). (The integral area of DMSO ( $\delta=2.52$ ) was set as 1.0, and thus gained the corresponding integral area of vinyl double bonds ( $\delta=5.63, 5.61$ ) in AAM at each time point. The conversion rate were indicated as percentage of the difference between the integral value in each time point and initial integral value relative to the initial integral value.)

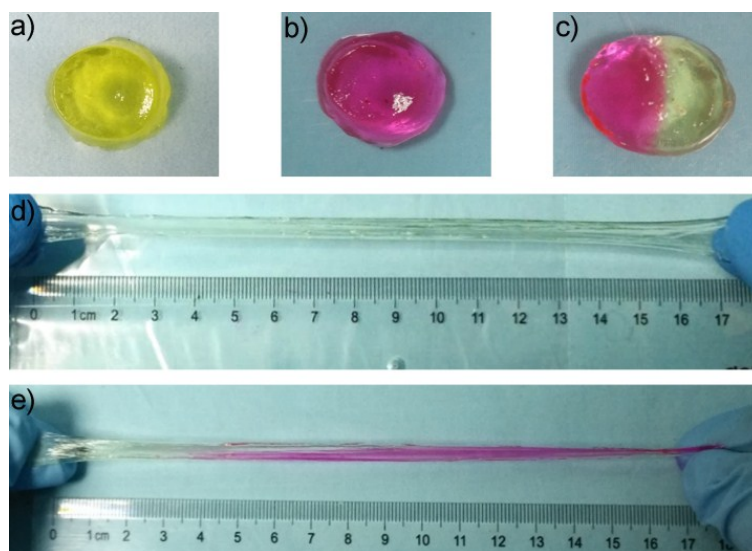

**Figure S7.** The self-healing property of the hydrogel. (a) The hydrogel. (b) The hydrogel with rhodamine B. (c) The hydrogel after self-healing. (d) The tensile of hydrogel. (e) The tensile of self-healing hydrogel.

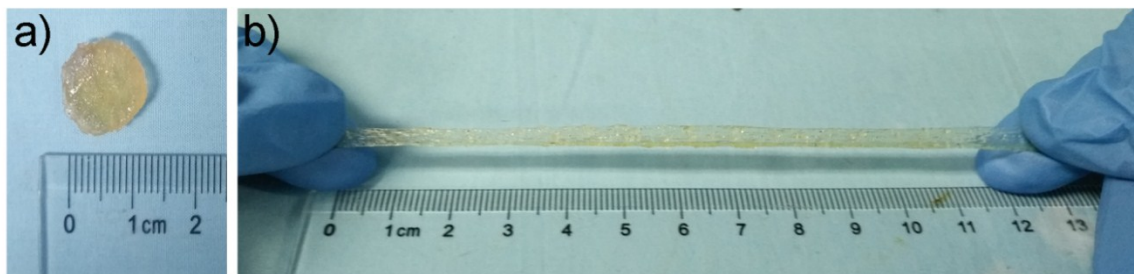

**Figure S8.** The tensile property of the regenerated hydrogels.

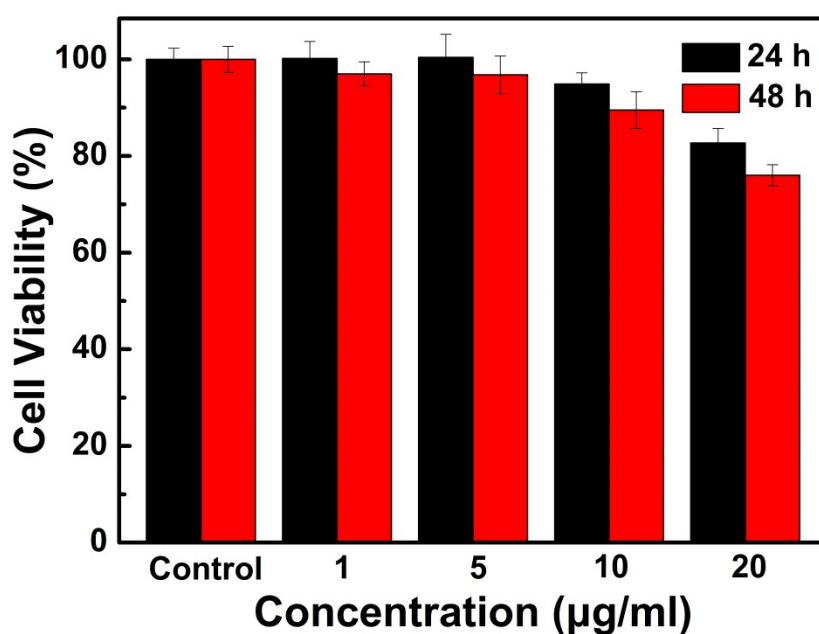

**Figure S9.** Cytotoxicity of the powder against NIH-3T3 cells (The CCK-8 assay indicated that 82% to 100% and 75% to 97% cells remain viable at various powder concentrations after 24 h and 48 h when co-cultured with NIH-3T3 cells).

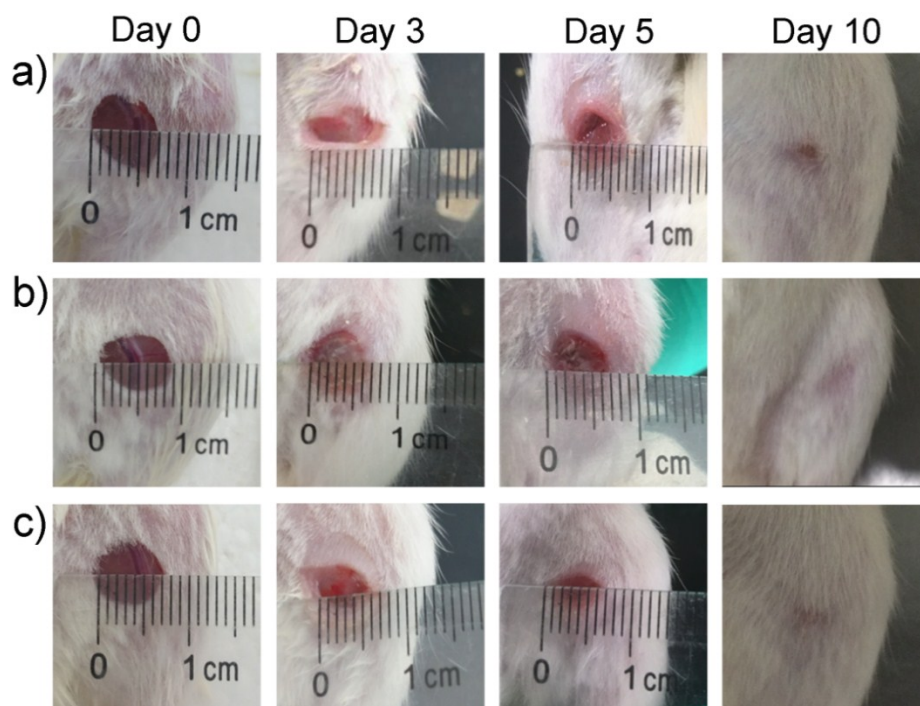

**Figure S10.** Photograph of wound treated with (a) control, (b) powder and (c) remolded hydrogels within 10 days.

**Table S1.** The  $M_n$ ,  $M_w$ , PDI and  $Y_p$  of the PAAM.

| $t_R$ (min) | $M_n$ (g mol <sup>-1</sup> ) | $M_w$ (g mol <sup>-1</sup> ) | PDI | $Y_p$ (%) |
|-------------|------------------------------|------------------------------|-----|-----------|
| 13.7        | 319187                       | 1665655                      | 5.2 | 100       |

#### 4. References

1. A. R. Fajardo, S. L. Fávaro, A. F. Rubira, E. C. Muniz, *React. Funct. Polym.* **2013**, 73, 1662-1671.
